# Supplementary material for: Bioinspired Scaffold Action Under the Extreme Physiological Conditions of Simulated Space Flights: Osteogenesis Enhancing Under Microgravity
Source: PubMed Central journal article supplement (PMC7362936; doi:10.3389/fbioe.2020.00722), 2020-07-08
Supplement: Image_1.pdf [file Image_1.pdf]

## *Supplementary Material*

### 1 Supplementary Figures

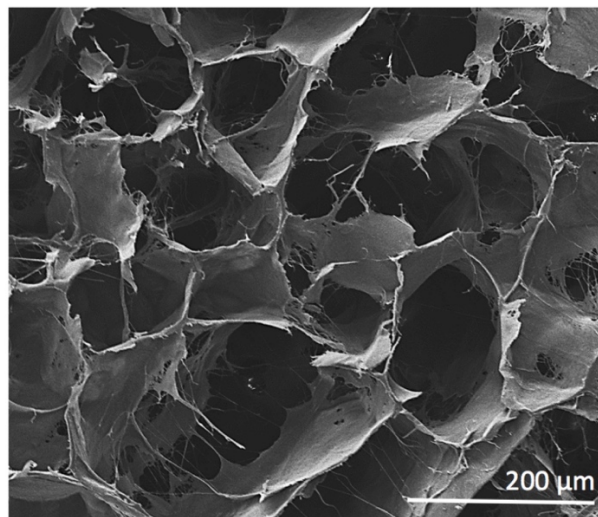

**Supplementary Figure 1.** Scaffold structure characterization by SEM of Coll.
